# Supplementary material for: Electron-withdrawing anion intercalation and surface sulfurization of NiFe-layered double hydroxide nanoflowers enabling superior oxygen evolution performance
Source: Royal Society of Chemistry journal article supplement (doi:10.1039/c9qi01367a), 2019-11-18
Supplement: c9qi01367a1.pdf [file c9qi01367a1.pdf]

## Electronic Supplementary Information

### **Electron-withdrawing anion intercalation and surface sulfurization of NiFe-layered double hydroxide nanoflowers enabling superior oxygen evolution performance**

Yan-Yan Dong,<sup>ab#</sup> Dong-Dong Ma,<sup>a#</sup> Xin-Tao Wu<sup>a</sup> and Qi-Long Zhu<sup>\*a</sup>

<sup>a</sup> *State Key Laboratory of Structure Chemistry, Fujian Institute of Research on the  
Structure of Matter, Chinese Academy of Science, Fuzhou 350002, China*

<sup>b</sup> *University of Chinese Academy of Sciences, Beijing 100049, China*

\* Corresponding Author: qlzhu@fjirsm.ac.cn

## 1. Material and reagents

Nickel nitrate hexahydrate (98%), ferric nitrate nonahydrate (98.5%), ammonium molybdate tetrahydrate (99%), urea (99%), thiourea (99%), and methanol (99.7%) were purchased from Sinopharm Chemical Reagent Co., Ltd (China). Ammonium hypophosphite (97%, Aladdin, China), Nafion D-521 dispersion (5% w/w in water and 1-propanol,  $\geq 0.92$  meq/g exchange capacity, Alfa Aesar), ammonium fluoride (99%, Adamas, China), and  $\text{RuO}_2$  (99.95%, Adamas, China) were used as received. Deionized water was generated by the HHitech purified water system.

## 2. Characterization

Powder X-ray diffraction (PXRD) patterns were collected on a desktop X-ray diffractometer (Rigaku-Miniflex600) with  $\text{Cu K}\alpha$  radiation. Fourier-transform infrared (FT-IR) spectra were recorded with KBr pellets using Perkin Elmer spectrometers in the range of  $500\text{--}4000\text{ cm}^{-1}$ . Scanning electron microscopy (SEM) was characterized on a JSM6700-F field-emission scan electron microscope. Transmission electron microscope (TEM) and high-resolution transmission electron microscope (HRTEM) characterizations were carried out on FEI Tecnai G2 F20 at an acceleration voltage of 200 kV. The X-ray photoelectron spectroscopy (XPS) data were collected on a Thermo Fisher ESCALAB 250Xi spectrometer, using C 1s (284.8 eV) as the reference line.

## 3. Synthesis of catalysts

### 3.1. Synthesis of NiFe-LDH:

Nickel nitrate hexahydrate (3.0 mmol) and ferric nitrate nonahydrate (1.0 mmol) were dissolved in 35.0 mL of methanol under stirring. Then, urea (11.0 mmol) and ammonium fluoride (1.0 mmol) were successively added into the above solution. After stirring for 30 min, the mixture was transferred into a 50 mL Teflon-lined autoclave, sealed and heated at  $150\text{ }^{\circ}\text{C}$  for 8 h. After cooled down to room temperature, the resulting samples were centrifuged, rinsed with methanol several times and dried in an oven at  $60\text{ }^{\circ}\text{C}$  for 8 h.

### 3.2. Synthesis of $\text{Mo}_x\text{-NiFe-LDH}$ :

Nickel nitrate hexahydrate (3.0 mmol) and ferric nitrate nonahydrate (1.0 mmol) were dissolved in 35.0 mL of methanol under stirring. Then, urea (11.0 mmol), ammonium fluoride (1.0 mmol), and ammonium molybdate tetrahydrate (0.035, 0.07, or 0.15 mmol) were successively added into the above solution. After stirring for 30 min, the mixture was transferred into a 50 mL Teflon-lined autoclave, sealed and heated at 150 °C for 8 h. After cooled down to room temperature, the resulting samples were centrifuged, rinsed with deionized water and methanol several times and dried in an oven at 60 °C for 8 h. Note:  $x$  is the molar quantity of the Mo element in added ammonium molybdate tetrahydrate.

### **3.3. Synthesis of PS-NiFe-LDH:**

100 mg of NiFe-LDH were dispersed in 35.0 mL methanol under stirring, and then thiourea (2.5 mmol) and ammonium hypophosphite (2.5 mmol) were added. After stirring for 30 min, the mixture was transferred into a 50 mL Teflon-lined autoclave, sealed and heated at 180 °C for 1 h. After cooled down to room temperature, the resulting samples were centrifuged, rinsed with methanol several times and dried in an oven at 60 °C for 8 h.

### **3.4. Synthesis of $\text{Mo}_x\text{PS-NiFe-LDH}$ :**

The preparation was performed following the same procedures as those for PS-NiFe-LDH, except that  $\text{Mo}_x\text{-NiFe-LDH}$  was used instead of NiFe-LDH. For comparison, a series of comparative samples were synthesized following the similar procedures, which include  $\text{Mo}_{0.5}\text{S-NiFe-LDH}$ ,  $\text{Mo}_{0.5}\text{P-NiFe-LDH}$  (to reveal the influence of the type of the intercalated anions),  $\text{Mo}_{0.5}\text{PS-NiFe-LDH}$  (3 or 6 h) (to reveal the influence of hydrothermal time),  $\text{Mo}_{0.5}\text{PS-Ni}_1\text{Fe}_1\text{-LDH}$ ,  $\text{Mo}_{0.5}\text{PS-Ni}_5\text{Fe}_1\text{-LDH}$  (to reveal the influence of Ni/Fe ratio).

## **4. Electrochemical measurements**

All the electrochemical measurements were performed with a CHI660E electrochemical workstation (Shanghai Chen-Hua Instrument Corporation, China) at room temperature in 1.0 M KOH (aq) electrolyte with a conventional three-electrode cells. A glassy carbon electrode (GCE, 3.0 mm in diameter), KCl saturated Ag/AgCl

electrode and Pt wires were served as the working electrode, reference electrode and counter electrode, respectively.

To prepare catalyst ink, 5.0 mg of catalyst powder was dispersed in 1.0 mL of mixture solvent with 700  $\mu\text{L}$  of deionized water, 200  $\mu\text{L}$  of DMF and 100  $\mu\text{L}$  of Nafion solution, then the mixture was ultrasonicated for 2 h to generate a homogeneous ink. Then, 6  $\mu\text{L}$  of this ink was drop-casted onto a 3.0 mm in diameter glassy carbon electrode with a loading mass of 0.425  $\text{mg cm}^{-2}$  and air-dried overnight. For comparison, the commercial  $\text{RuO}_2$  were loaded on a glassy carbon electrode with the same loading mass.

Before the electrochemical measurement, the electrolyte (1.0 M KOH) was degassed by bubbling pure oxygen for 30 min to ensure the  $\text{H}_2\text{O}/\text{O}_2$  equilibrium at 1.23 V vs. RHE. The working electrodes were cycled several times by cyclic voltammetry (CV) before other measurements. The linear sweep voltammetry (LSV) polarization curves were tested at a scan rate of 5.0  $\text{mV s}^{-1}$  without IR-compensation. Tafel plots were obtained from the extrapolation of the linear region of a plot of overpotential versus current density. CV curves were measured in the region of 1.13–1.24 (V vs. RHE) at various scan rates (10, 15, 20, 25, 30  $\text{mV s}^{-1}$ ) for the calculation of the double-layer capacitance ( $C_{dl}$ ). The electrochemical impedance spectroscopy (EIS) was conducted at overpotential  $\eta = 274$  mV from  $10^5$  to 0.1 Hz with an amplitude of 5.0 mV. All the final potentials were calibrated with respect to a reversible hydrogen electrode (RHE), and the overpotential ( $\eta$ ) was calculated by using the formula:  $\eta$  (V) =  $E_{\text{RHE}} - 1.23$ . I–t curve measurements were collected on the catalyst-coated nickel foam ( $1.00 \text{ cm}^2$ ) at a static potential of 0.43 V vs. SCE with a loading mass of 1.00  $\text{mg cm}^{-2}$ . Each measurement was repeated three times in order to avoid any incidental error.

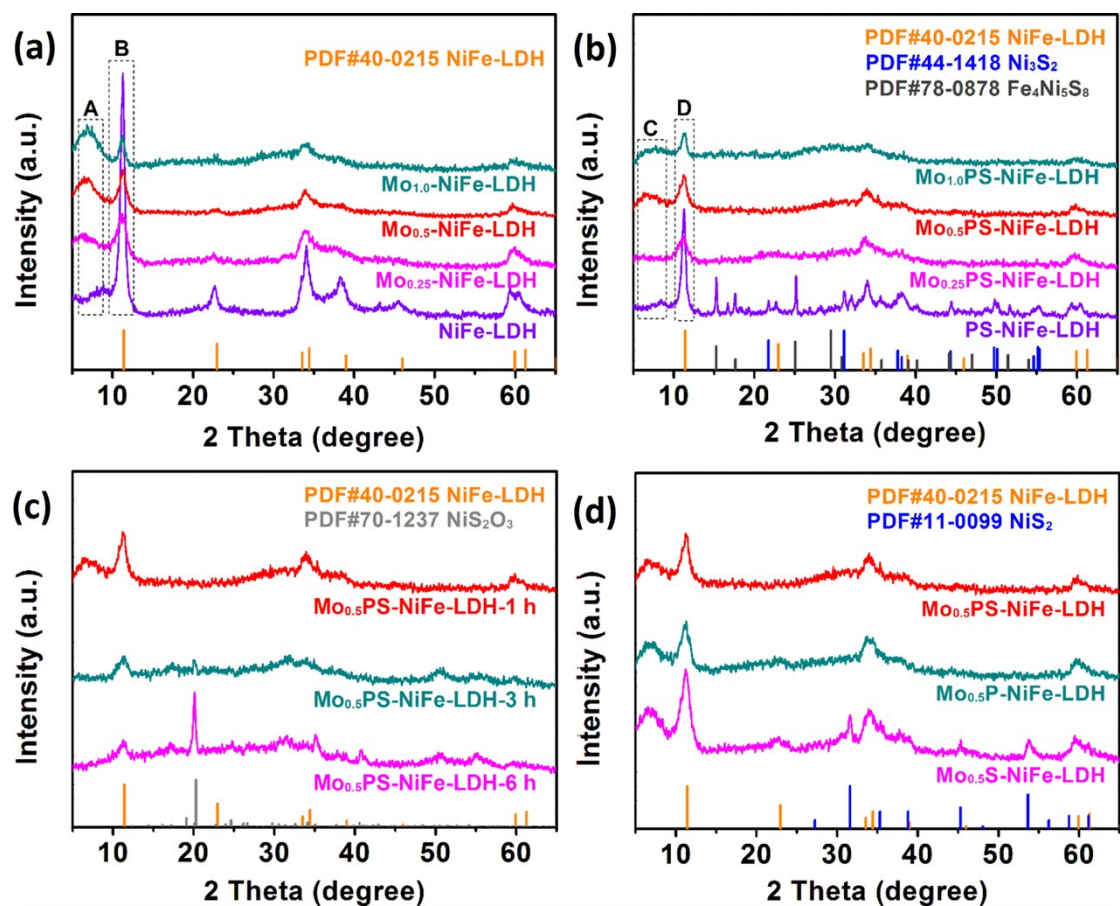

**Fig. S1** PXRD patterns of (a) Mo<sub>x</sub>-NiFe-LDH, (b) Mo<sub>x</sub>PS-NiFe-LDH, and (c, d) other comparative samples.

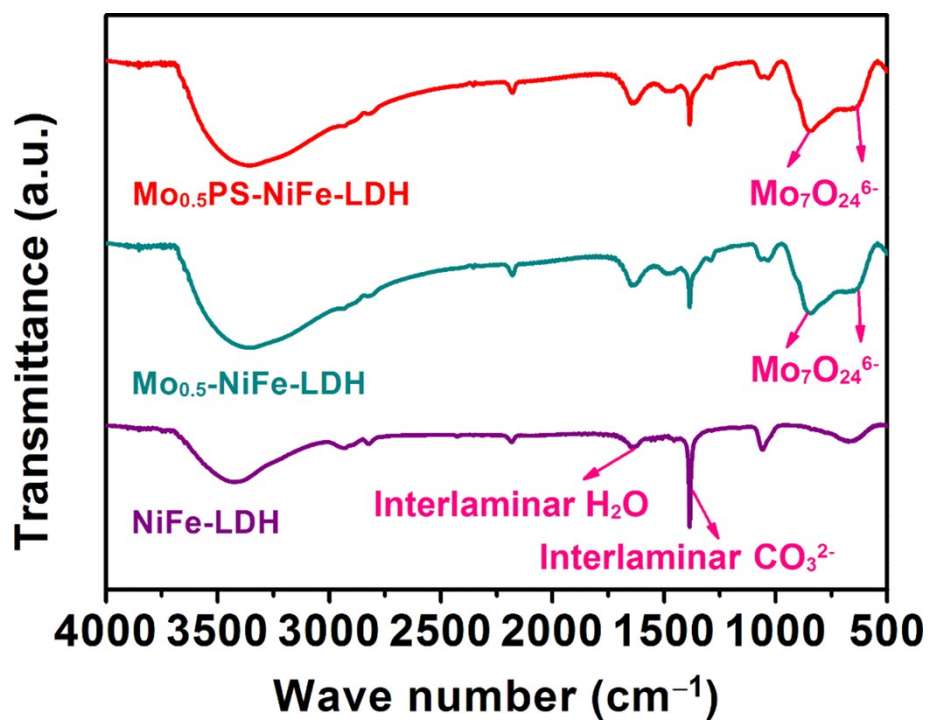

Fig. S2 FT-IR microscopy of NiFe-LDH, Mo<sub>0.5</sub>-NiFe-LDH and Mo<sub>0.5</sub>PS-NiFe-LDH.

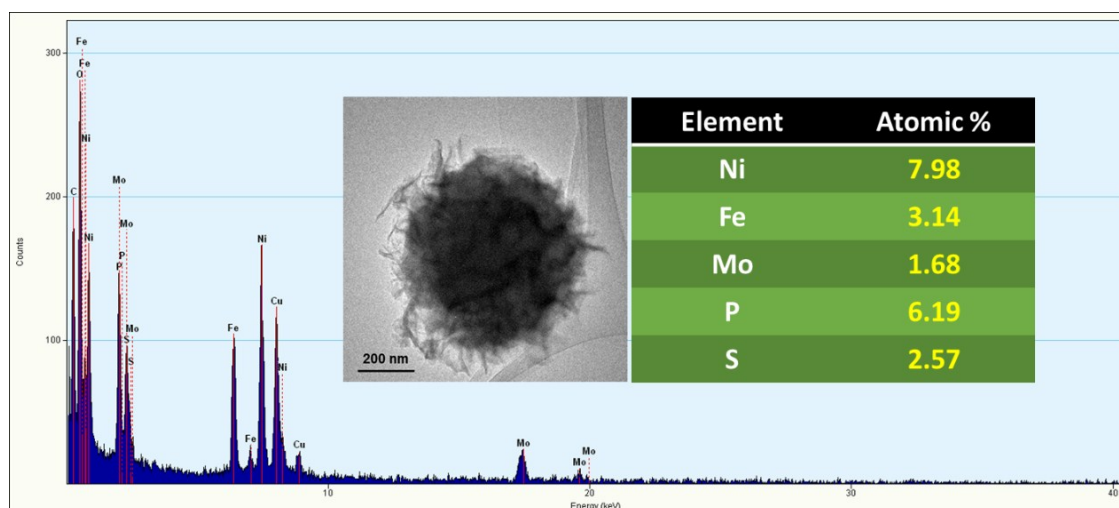

**Fig. S3** EDX spectrum of Mo<sub>0.5</sub>PS-NiFe-LDH (Inset: TEM image of Mo<sub>0.5</sub>PS-NiFe-LDH and atomic ratio of the elements in Mo<sub>0.5</sub>PS-NiFe-LDH).

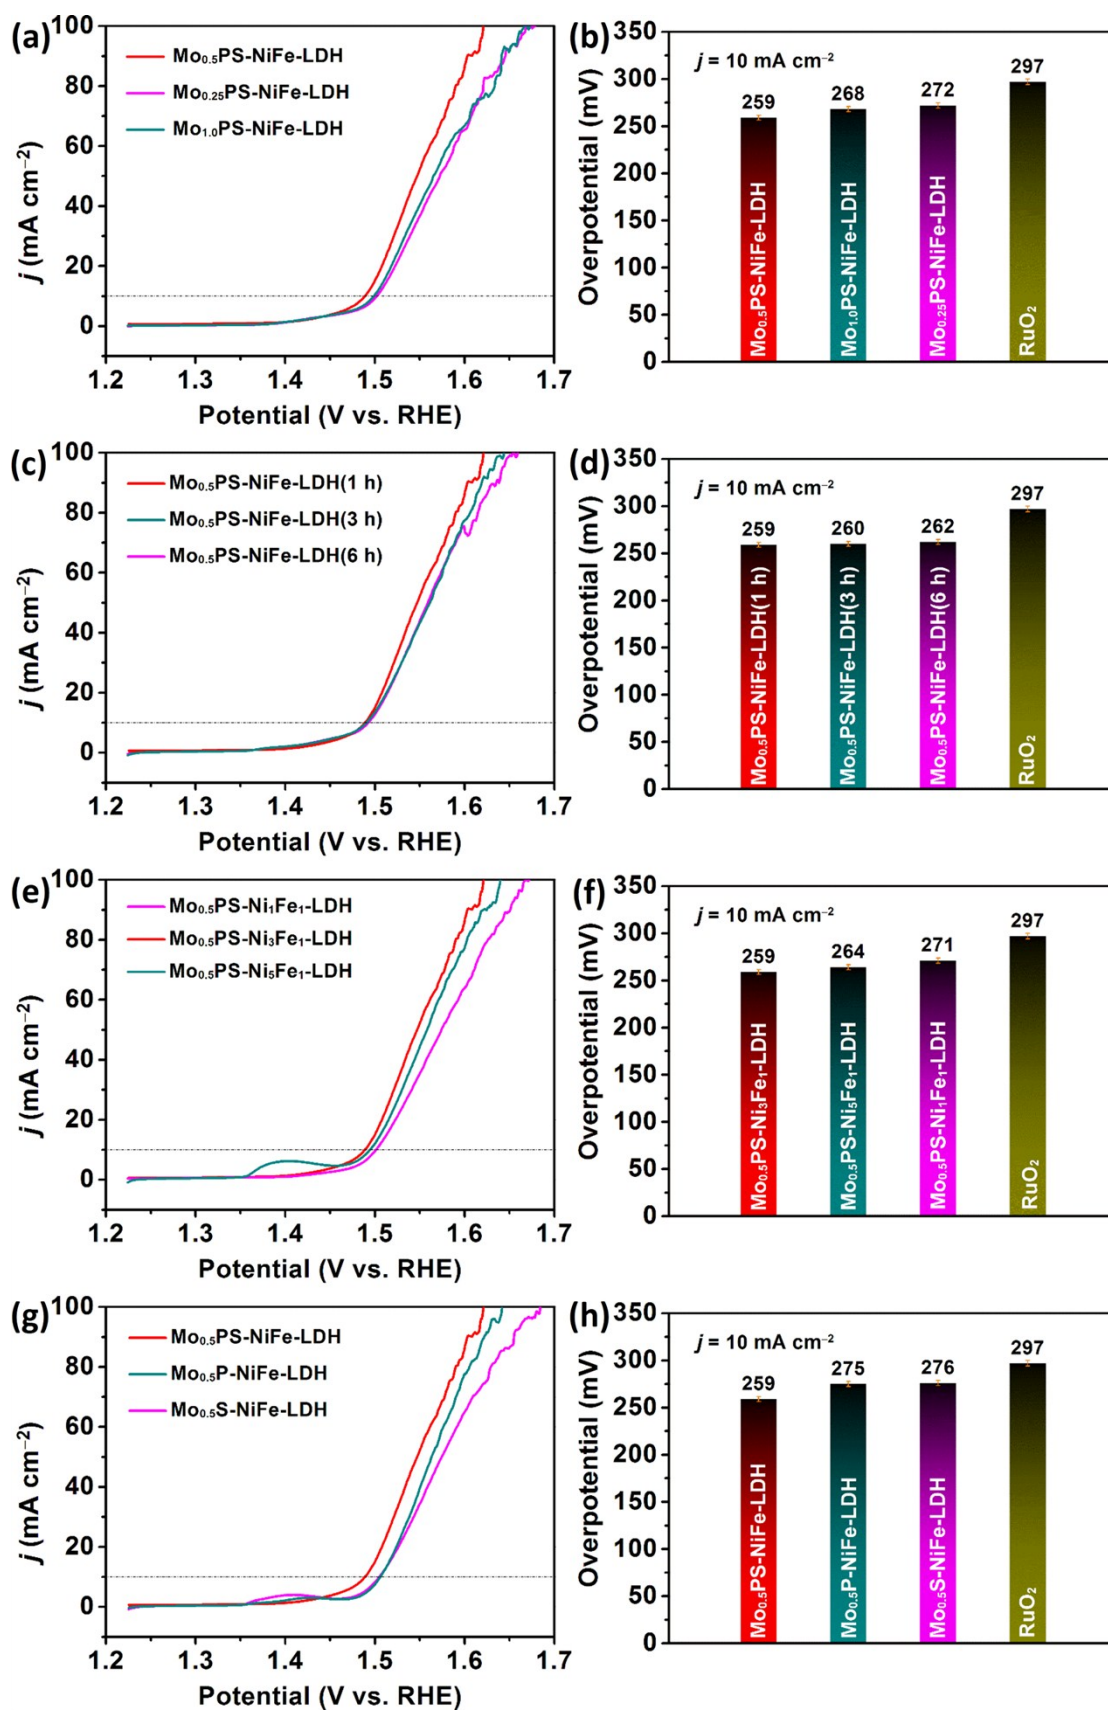

**Fig. S4** LSV curves of different catalysts and the comparison of their overpotentials to reach the current density of  $10 \text{ mA cm}^{-2}$ .



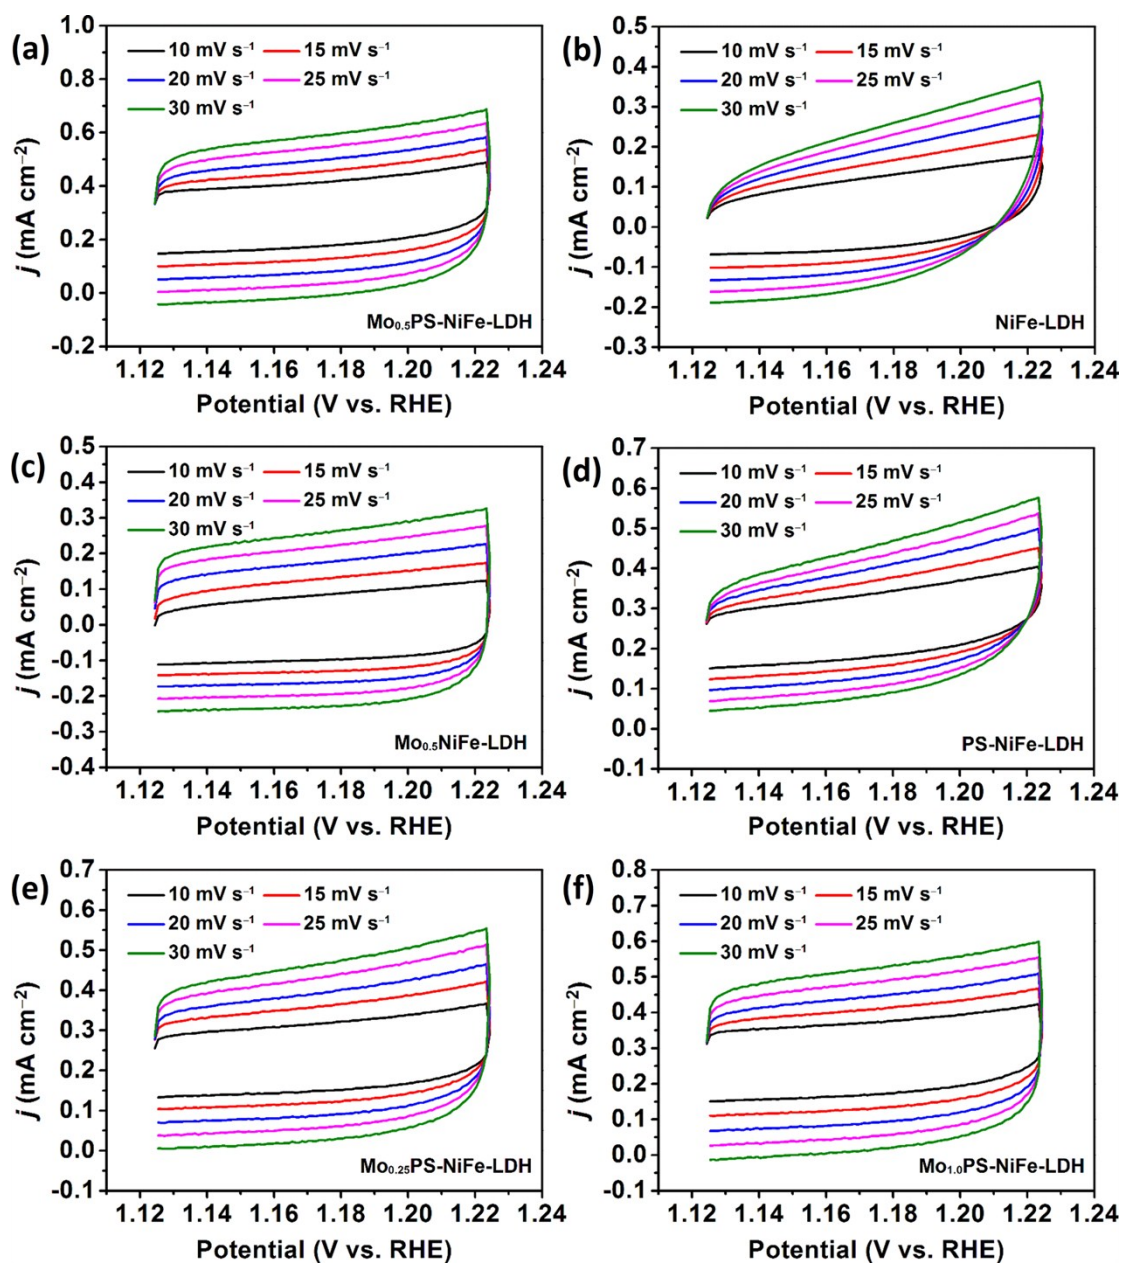

**Fig. S5** CV curves of (a)  $\text{Mo}_{0.5}\text{PS-NiFe-LDH}$ , (b)  $\text{NiFe-LDH}$ , (c)  $\text{Mo}_{0.5}\text{-NiFe-LDH}$ , (d)  $\text{PS-NiFe-LDH}$ , (e)  $\text{Mo}_{0.25}\text{PS-NiFe-LDH}$ , and (f)  $\text{Mo}_{1.0}\text{PS-NiFe-LDH}$  at different scan rates.

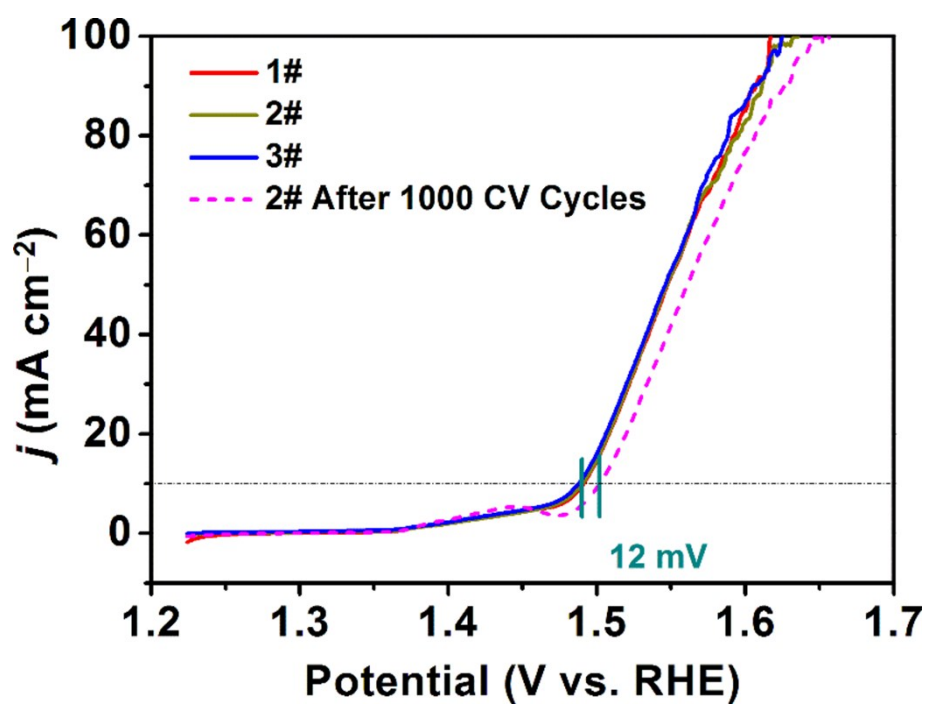

**Fig. S6** LSV curves of Mo<sub>0.5</sub>PS-NiFe-LDH with parallel samples, before and after 1000 CV cycles.

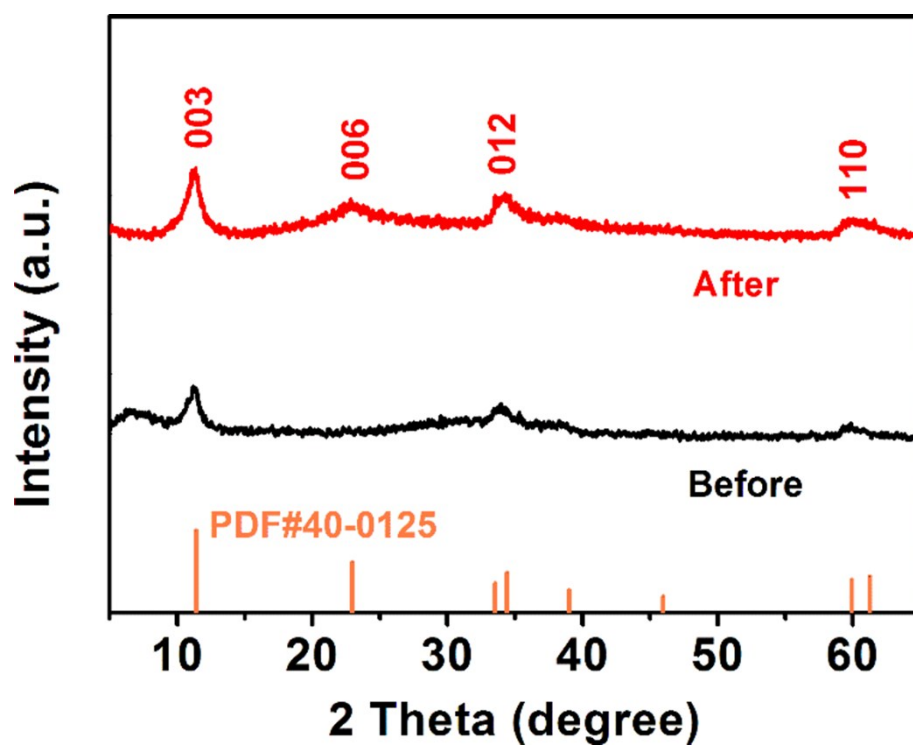

**Fig. S7** PXRD patterns of Mo<sub>0.5</sub>PS-NiFe-LDH before and after OER test.

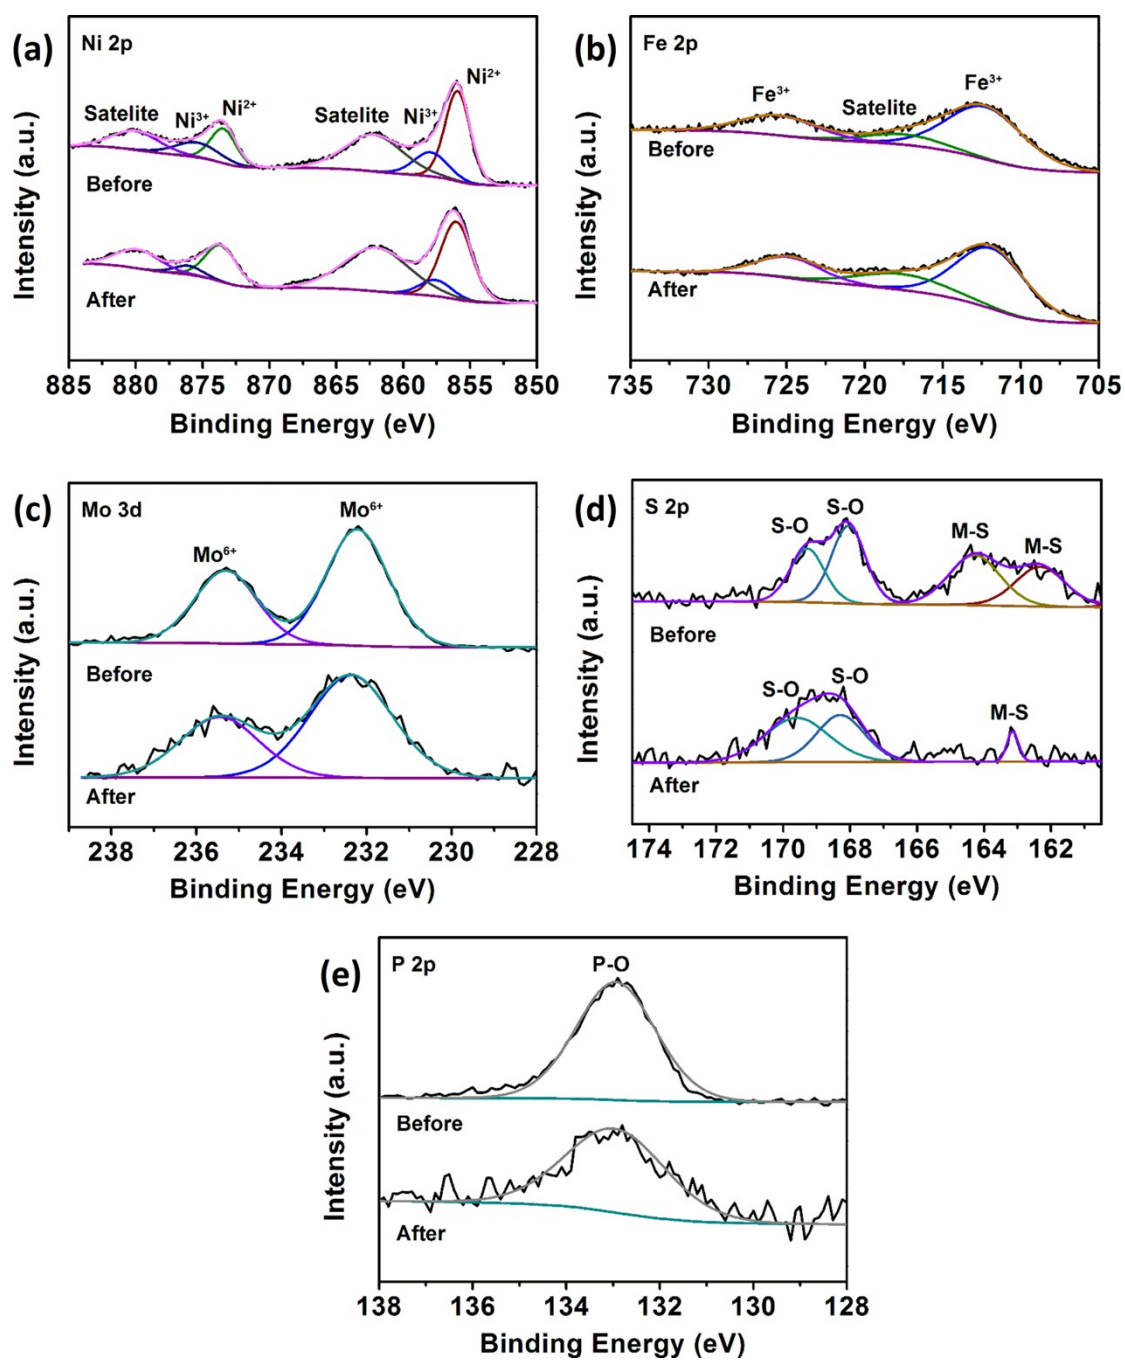

**Fig. S8** XPS spectra of Mo<sub>0.5</sub>PS-NiFe-LDH before and after OER test.

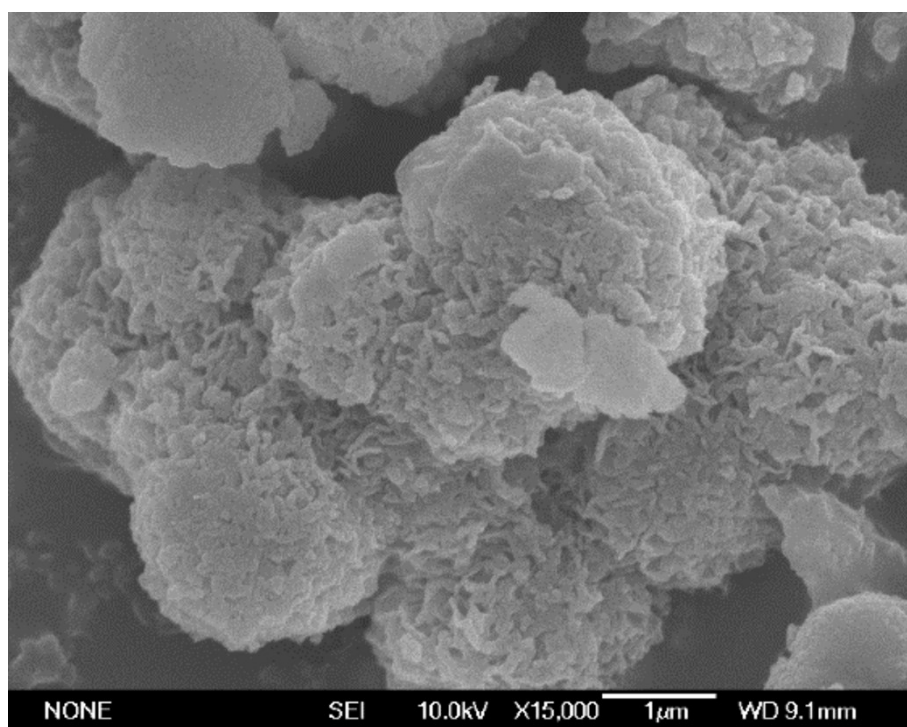

**Fig. S9** SEM image of Mo<sub>0.5</sub>PS-NiFe-LDH after OER test.

**Table S1** Comparison of the OER performance of Mo<sub>0.5</sub>PS-NiFe-LDH to other recently reported OER electrocatalysts.

| Catalysts                                               | Electrode   | Electrolyte | $\eta$ @10 mA<br>cm <sup>-2</sup> (mV) | Tafel Slope<br>(mV dec <sup>-1</sup> ) | Ref.                                                           |
|---------------------------------------------------------|-------------|-------------|----------------------------------------|----------------------------------------|----------------------------------------------------------------|
| Mo <sub>0.5</sub> PS-NiFe-LDH                           | GCE         | 1 M KOH     | 259                                    | 62                                     | This work                                                      |
| Ni <sub>3</sub> FeN-NPs                                 | GCE         | 1 M KOH     | 280                                    | 46                                     | <i>Adv. Energy Mater.</i> , 2016, <b>6</b> , 1502585           |
| (Co,Ni)Se <sub>2</sub> @NiFe<br>LDH                     | GCE         | 1 M KOH     | 277                                    | 75                                     | <i>ACS appl. Mater. Surfaces</i> , 2019, <b>11</b> , 8106–8114 |
| CoCo-LDH 2D<br>nanomesh                                 | GCE         | 1 M KOH     | 319                                    | 42                                     | <i>Adv. Energy Mater.</i> , 2018, <b>9</b> , 1803060           |
| CoFe LDHs-Ar                                            | GCE         | 1 M KOH     | 266                                    | 38                                     | <i>Angew. Chem. Int. Ed.</i> , 2017, <b>56</b> , 1–6           |
| Ag NP/NiRu-LDHs                                         | GCE         | 0.1 M KOH   | 310                                    | 33                                     | <i>ACS Catal.</i> , 2018, <b>9</b> , 117–129                   |
| GDY@NiFe                                                | Copper Foil | 1 M KOH     | 260                                    | 95                                     | <i>ACS appl. Mater. Surfaces</i> , 2019, <b>11</b> , 2662–2669 |
| (NiFe)S <sub>2</sub> -GN                                | GCE         | 1 M KOH     | 320                                    | 61                                     | <i>Electrochim. Acta</i> , 2018, <b>286</b> , 195–204          |
| Ni <sub>0.83</sub> Fe <sub>0.17</sub> (OH) <sub>2</sub> | GCE         | 1 M KOH     | 245                                    | 61                                     | <i>ACS Catal.</i> , 2018, <b>8</b> , 5382–5390                 |
| Co <sub>3</sub> Fe <sub>1.5</sub> -LDH/GC               | GCE         | 1 M KOH     | 286                                    | 45                                     | <i>Nanoscale</i> , 2017, <b>9</b> , 16467–16475                |
| Ni-Fe LDH hollow<br>nanoprisms                          | GCE         | 1 M KOH     | 280                                    | 49                                     | <i>Angew. Chem. Int. Ed.</i> , 2018, <b>57</b> , 172–176       |
| NiFeMo                                                  | GCE         | 1 M KOH     | 280                                    | 40                                     | <i>J. Mater. Chem. A</i> , 2015, <b>3</b> , 16348–16353        |
| NiCoP/C<br>nanoboxes                                    | GCE         | 1 M KOH     | 330                                    | 96                                     | <i>Angew. Chem. Int. Ed.</i> , 2017, <b>56</b> , 3897–3900     |
| PA-CoS <sub>x</sub> (OH) <sub>y</sub>                   | Ni Foam     | 1 M KOH     | 261                                    | 48                                     | <i>J. Mater. Chem. A</i> , 2018, <b>6</b> , 24311–4316         |
| Co-Mo-PHP                                               | GCE         | 1 M KOH     | 294                                    | 57                                     | <i>Appl. Catal. B Environ.</i> , 2019, <b>255</b> , 117744     |
| NiCoP/NSP-<br>HPCNS                                     | GCE         | 1 M KOH     | 299                                    | 71                                     | <i>Mater. Chem. Front.</i> , 2019, <b>3</b> , 1849–1858        |
